# Supplementary material
Source: publisher site journal article supplement (https://mbmg.pensoft.net/article/download/suppl/3916252/)
Supplement: Supplementary file 1

**Supplementary Table 3.** Family level taxa (GenBank data), at 3 minimum read depth:

| Merino Only | Dorper Only | Goat Only | Dorper and Merino | Merino and Goat | Dorper and Goat | Dorper, Merino and Goat |
| --- | --- | --- | --- | --- | --- | --- |
| Cucurbitaceae | Caryophyllaceae | Haloragaceae | Euphorbiaceae | Casuarinaceae | Geraniaceae | Aizoaceae |
| Elatinaceae | Nyctaginaceae |  | Lamiaceae | Scrophulariaceae | Marsileaceae | Amaranthaceae |
|  | Oxalidaceae |  | Solanaceae |  |  | Asteraceae |
|  | Plumbaginaceae |  |  |  |  | Brassicaceae |
|  | Zygophyllaceae |  |  |  |  | Convolvulaceae |
|  |  |  |  |  |  | Fabaceae |
|  |  |  |  |  |  | Goodeniaceae |
|  |  |  |  |  |  | Malvaceae |
|  |  |  |  |  |  | Myrtaceae |
|  |  |  |  |  |  | Poaceae |
